# Supplementary material for: Primary Care–Mental Health Integration in the VA: Shifting Mental Health Services for Common Mental Illnesses to Primary Care
Source: Atypon-hosted journal article supplement (doi:10.1176/appi.ps.201700190), 2017-12-15
Supplement: appi.ps.201700190.ds001.pdf [file appi.ps.201700190.ds001.pdf]

## Appendix 1: VA Electronic Encounter Codes Used to Identify Mental Health Specialty Visits

| <b>Encounter Code</b> | <b>Description</b>                                                                   |
|-----------------------|--------------------------------------------------------------------------------------|
| 156                   | Home Based Primary Care (HBPC)-psychologist                                          |
| 157                   | HBPC-psychiatrist                                                                    |
| 163                   | Chaplain clinical services-individual                                                |
| 164                   | Chaplain clinical services-group                                                     |
| 165                   | Bereavement counsel                                                                  |
| 166                   | Chaplain service-individual                                                          |
| 167                   | Chaplain service-group                                                               |
| 168                   | Chaplain service-collateral                                                          |
| 501                   | Homeless Mentally Ill (HMI) outreach                                                 |
| 502†                  | Mental health-individual                                                             |
| 504†                  | Grant & per diem group                                                               |
| 505                   | Day treatment-individual                                                             |
| 506                   | Day hospital-individual                                                              |
| 507                   | Housing and Urban Development-VA Supportive Housing (HUD-VASH) group                 |
| 508                   | Healthcare for Homeless Veterans/Homeless Chronically Mentally Ill (HCHV/HCMI) group |
| 509†                  | Psychiatry                                                                           |
| 510†                  | Psychology                                                                           |
| 511†                  | Grant & per diem-individual                                                          |
| 512†                  | Psychiatry consultation                                                              |
| 513                   | Substance use disorder-individual                                                    |
| 514                   | Substance use disorder-home visit                                                    |
| 515                   | Compensated Work Therapy/Transitional Work Experience (CWT/TWE)-HCMI                 |
| 516                   | Post-traumatic stress disorder (PTSD)-group                                          |
| 517                   | CWT/substance abuse                                                                  |
| 518                   | CWT/transitional residence substance abuse                                           |
| 519                   | Substance abuse disease/PTSD teams                                                   |
| 520                   | Long term enhancement-individual                                                     |
| 521                   | Long term enhancement-group                                                          |
| 522                   | HUD/VASH-individual                                                                  |
| 523                   | Opioid substitution                                                                  |
| 524                   | Active duty sex trauma                                                               |
| 525                   | Women's stress disorder                                                              |
| 529                   | HCHV/HCMI-individual                                                                 |
| 532                   | Psychosocial rehabilitation-individual                                               |
| 533                   | Mental health intervention biomed care-individual                                    |
| 534*                  | Mental health integrated care-individual                                             |
| 535                   | Mental health vocational assistance-individual                                       |
| 538†                  | Psychological testing                                                                |
| 539*                  | Mental health integrated care-group                                                  |
| 540                   | PTSD clinical team-individual                                                        |
| 541                   | PTSD clinic                                                                          |
| 545                   | Telephone/Substance use disorder                                                     |
| 547                   | Intensive substance use disorder-group                                               |
| 548                   | Intensive substance use disorder-individual                                          |
| 550†                  | Mental health clinic-group                                                           |
| 551                   | Intensive Psychiatric Community Care (IPCC) community clinic/day program visit       |
| 552                   | Mental Health Intensive Case Management (MHICM)-individual                           |
| 553                   | Day treatment-group                                                                  |
| 554                   | Day hospital-group                                                                   |
| 555                   | Drug dependence-group                                                                |
| 556                   | Alcohol treatment-group                                                              |
| 557†                  | Psychiatry-group                                                                     |
| 558†                  | Psychology-group                                                                     |
| 559                   | Psychosocial rehabilitation-group                                                    |
| 560                   | Substance use disorder-group                                                         |
| 561                   | PTSD clinical team-group                                                             |
| 562                   | PTSD-individual                                                                      |
| 564†                  | Mental health team case management                                                   |
| 565                   | Mental health intervention biomed-group                                              |
| 566                   | Mental health risk-factor reduction educational-group                                |
| 567                   | MHICM-group                                                                          |
| 568                   | Mental health Compensated Work Therapy/Supported Employment (CWT/SE) face-to-face    |
| 569                   | Mental health CWT/SE non face-to-face CBO non-count                                  |
| 570                   | Mental health CWT/TWE non face-to-face CBO non-count                                 |
| 571                   | Services for Returning Veterans-Mental Health (SeRV-MH)-individual                   |
| 572                   | SeRV-MH-group                                                                        |
| 573                   | Mental health incentive therapy face-to-face                                         |
| 574                   | Mental health CWT/TWE face to face                                                   |
| 575                   | Mental health vocational assistance-group                                            |
| 576                   | Psycho-geriatric clinic-individual                                                   |
| 577                   | Psycho-geriatric clinic-group                                                        |
| 578                   | Psycho-geriatric clinic-day program                                                  |
| 579                   | Telephone/ Psycho-geriatrics                                                         |
| 580                   | PTSD day hospital                                                                    |
| 581                   | PTSD day treatment                                                                   |
| 582                   | Psychosocial Rehabilitation Recovery Center (PRRC)-individual                        |
| 583                   | PRRC-group                                                                           |
| 584                   | Telephone/ PRRC                                                                      |
| 589                   | Non-active duty sex trauma                                                           |
| 590                   | Community Outreach to Homeless Veterans by Staff Other than HCHV and RRTP Programs   |
| 591                   | Incarcerated Veterans reentry                                                        |
| 593                   | Residential Rehabilitation Treatment Program (RRTP) Outreach Services                |
| 594                   | RRTP aftercare community                                                             |
| 595                   | RRTP aftercare group                                                                 |
| 596                   | RRTP admission screening services                                                    |
| 597                   | Telephone/RRTP                                                                       |
| 598                   | RRTP outpatient-individual                                                           |
| 599                   | RRTP outpatient-group                                                                |

\*Indicates outpatient visits for mental health integrated care by a mental health provider in Primary Care-Mental Health Integrated (PC-MHI) programs.

†Indicates general mental health specialty (MHS) visits.



Appendix 2: Calculated Clinic PC-MHI Engagement Rate in each Study Year

| Clinic                | FY09  | FY10  | FY11  | FY12  | FY13  |
|-----------------------|-------|-------|-------|-------|-------|
| 1                     | 0.0%  | 0.0%  | 0.0%  | 0.0%  | 0.0%  |
| 2                     | 0.0%  | 0.0%  | 0.0%  | 0.0%  | 0.0%  |
| 3                     | 0.0%  | 0.0%  | 0.0%  | 1.7%  | 5.1%  |
| 4                     | 0.0%  | 0.0%  | 0.7%  | 2.9%  | 8.2%  |
| 5                     | 0.0%  | 0.1%  | 1.5%  | 1.6%  | 1.5%  |
| 6                     | 0.0%  | 0.6%  | 11.0% | 12.3% | 10.4% |
| 7*                    | 0.0%  | 2.1%  | 3.4%  | 3.7%  | 9.3%  |
| 8                     | 0.0%  | 8.8%  | 11.9% | 17.6% | 10.4% |
| 9                     | 0.2%  | 0.1%  | 0.1%  | 0.0%  | 0.0%  |
| 10                    | 0.2%  | 0.4%  | 0.0%  | 0.0%  | 0.0%  |
| 11                    | 0.3%  | 0.2%  | 0.0%  | 0.0%  | 0.0%  |
| 12                    | 0.3%  | 2.2%  | 4.0%  | 4.3%  | 5.6%  |
| 13                    | 0.5%  | 5.0%  | 8.2%  | 25.7% | 15.0% |
| 14                    | 0.7%  | 0.0%  | 26.1% | 31.5% | 33.7% |
| 15                    | 1.1%  | 10.5% | 14.5% | 16.6% | 21.4% |
| 16*                   | 1.2%  | 3.6%  | 7.0%  | 9.0%  | 8.3%  |
| 17                    | 1.3%  | 1.1%  | 1.5%  | 1.6%  | 0.5%  |
| 18                    | 1.5%  | 2.1%  | 2.7%  | 4.0%  | 6.5%  |
| 19                    | 2.0%  | 2.0%  | 1.5%  | 0.7%  | 0.3%  |
| 20                    | 2.1%  | 7.4%  | 4.5%  | 5.8%  | 4.3%  |
| 21                    | 2.5%  | 6.8%  | 9.0%  | 18.4% | 22.7% |
| 22                    | 4.2%  | 16.3% | 22.8% | 18.5% | 18.8% |
| 23*                   | 4.5%  | 5.8%  | 7.0%  | 6.5%  | 15.6% |
| 24*                   | 5.0%  | 4.5%  | 4.6%  | 6.3%  | 11.4% |
| 25                    | 5.9%  | 27.9% | 30.5% | 21.6% | 20.4% |
| 26                    | 6.7%  | 23.3% | 23.3% | 33.1% | 36.1% |
| 27                    | 13.7% | 5.3%  | 0.5%  | 10.1% | 14.6% |
| 28                    | 14.0% | 30.7% | 34.9% | 40.7% | 34.7% |
| 29                    | 15.9% | 26.0% | 25.4% | 32.4% | 36.7% |
| <b>First Quartile</b> | 0.0%  | 0.2%  | 0.7%  | 1.6%  | 1.5%  |
| <b>Median</b>         | 1.1%  | 2.2%  | 4.5%  | 6.3%  | 9.3%  |
| <b>Third Quartile</b> | 4.2%  | 7.4%  | 11.9% | 18.4% | 18.8% |

\*Denotes VA Healthcare System-based clinics
